# Supplementary material for: Oviduct Histopathology of Internal Laying and Egg-Bound Syndrome in Laying Hens
Source: MDPI journal article supplement (doi:10.3390/vetsci10040260), 2023-03-29
Supplement: s1 [file s1]

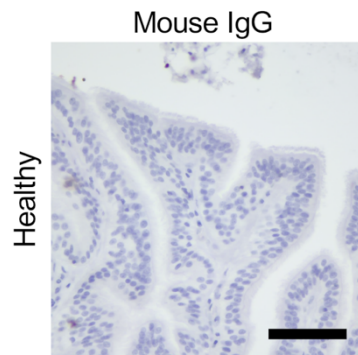

Supplementary Figure S1: Negative controls of immunohistochemistry using normal mouse IgG. Bar = 50  $\mu\text{m}$ .
