# Supplementary material for: Oviduct Histopathology of Internal Laying and Egg-Bound Syndrome in Laying Hens
Source: MDPI journal article supplement (doi:10.3390/vetsci10040260), 2023-03-29
Supplement: s1 [file s1]

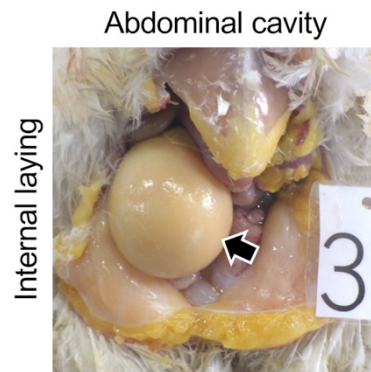

Supplementary Figure S2: Gross image of abdominal cavity of hens with internal laying of the eggs with shell membrane (black arrow).
